# Supplementary material for: Study on boron-containing electrolytes at extra-high temperatures for lithium-ion batteries
Source: Royal Society of Chemistry journal article supplement (doi:10.1039/d0se00529k), 2020-01-01
Supplement: d0se00529k1.pdf [file d0se00529k1.pdf]

## Study on boron-containing electrolyte at extra-high temperature for lithium ion batteries

Li Yang<sup>a</sup>, Peng Wang<sup>a</sup>, Dongni Zhao<sup>a</sup>, Yuan Wei<sup>a</sup>, Yamin Han<sup>a</sup>, Shuangwei Zeng<sup>a</sup>, Chao Wang<sup>a</sup>,  
Shiyu Li<sup>a,b,\*</sup>

<sup>a</sup>College of Petrochemical Technology, Lanzhou University of Technology, Lanzhou 730050, PR  
China

<sup>b</sup>Gansu Engineering Laboratory of Electrolyte Material for Lithium-ion Battery, Lanzhou 730050,  
PR China

\* Corresponding author: E-mail: [lishiyoulw@163.com](mailto:lishiyoulw@163.com) (S. Li)

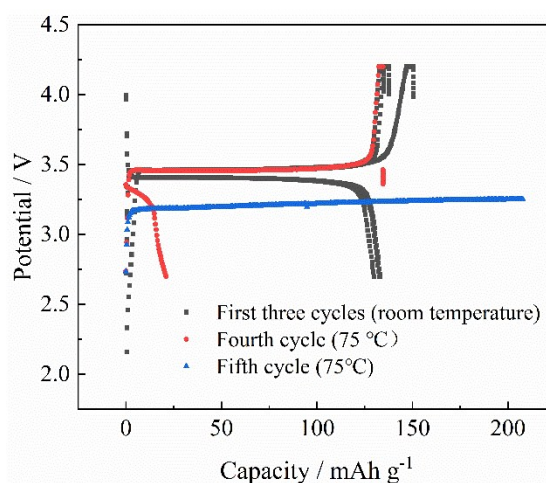

**Fig. S1** The charge-discharge profiles of LFP/Li cells with LiPF<sub>6</sub>-EC/DEC at room temperature (first three cycles) and 75 °C (fourth cycle) respectively.

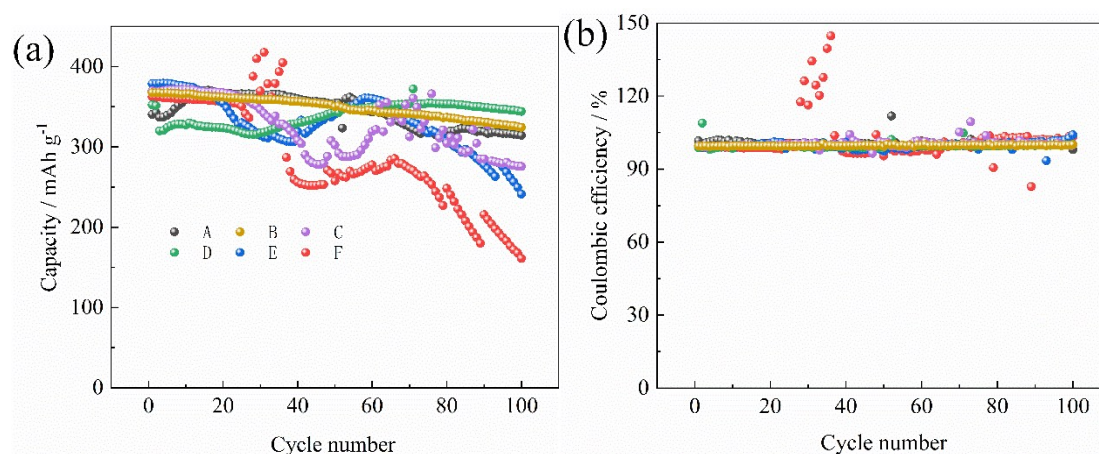

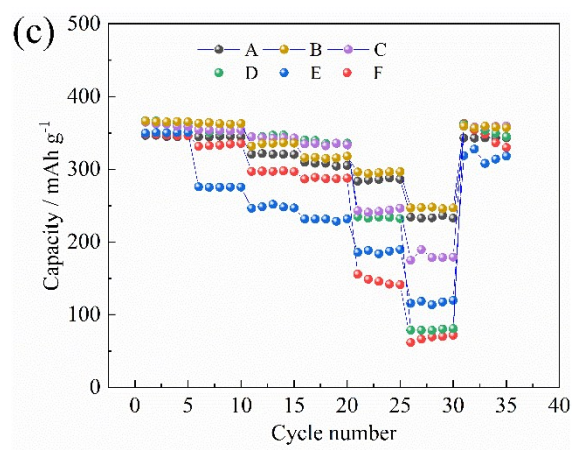

**Fig.S2** (a) The cyclic curves with a rate of 0.5 C, (b) coulomb efficiency and (C) rate performance (0.1 C, 0.2 C, 0.5 C, 1.0 C, 2 C, 5 C and 0.1 C) curves of Li/graphite cells at 75 °C.

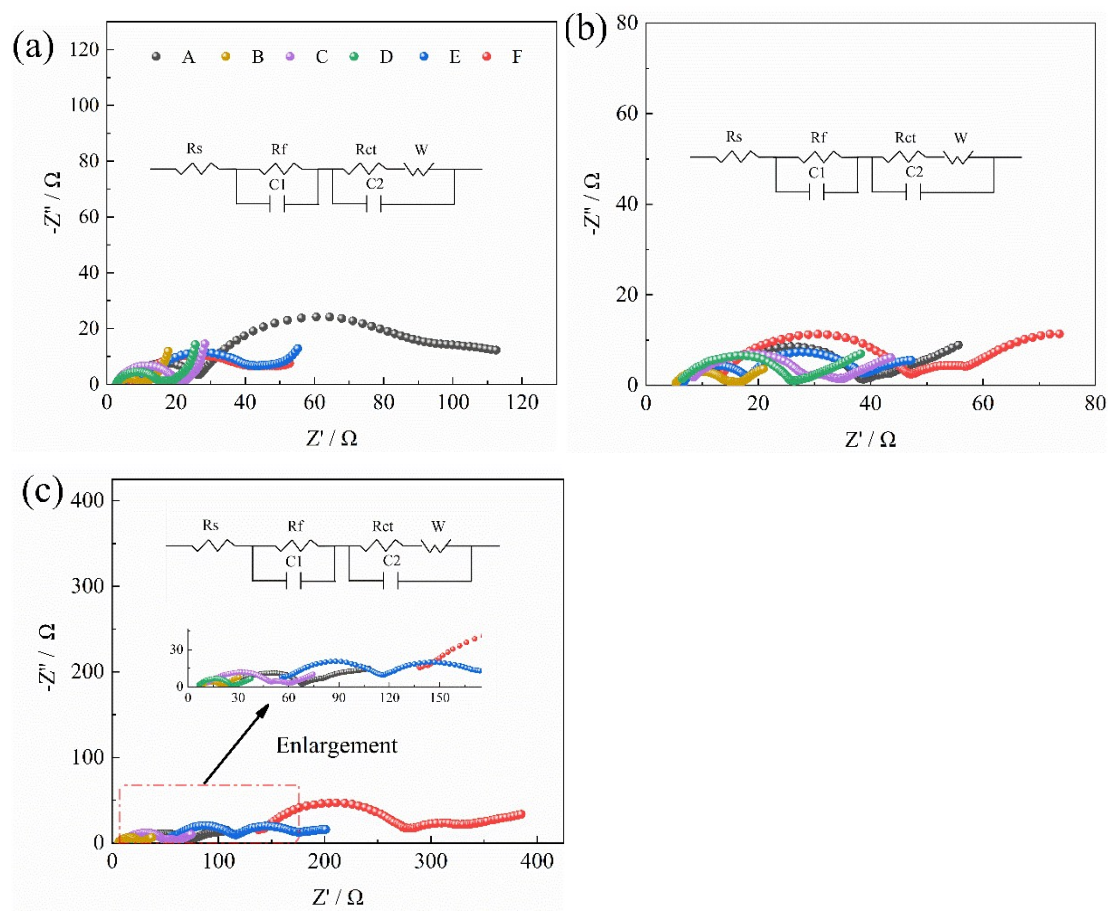

**Fig. S3** The EIS spectra of Li/ graphite cells after (a) 1, (b) 50 and (c) 100 cycles at 75°C (tested at a fully lithium-embedded state).

Table S1 The EIS fitting data of Li/graphite cells with different electrolytes at 75°C after first, 50 and 100 cycles

| Electrolyte | $R_s/\Omega$ | $R_f/\Omega$ | $R_{ct}/\Omega$ | $R_s/\Omega$ | $R_f/\Omega$ | $R_{ct}/\Omega$ | $R_s/\Omega$ | $R_f/\Omega$ | $R_{ct}/\Omega$ |
|-------------|--------------|--------------|-----------------|--------------|--------------|-----------------|--------------|--------------|-----------------|
|             | 1 cycle      |              |                 | 50 cycles    |              |                 | 100 cycles   |              |                 |
| A           | 6.40         | 5.32         | 19.68           | 9.66         | 30.13        | 5.12            | 23.92        | 47.77        | 15.34           |
| B           | 3.84         | 5.26         | 1.39            | 5.86         | 7.07         | 1.39            | 8.25         | 5.40         | 6.84            |
| C           | 3.15         | 11.79        | 5.34            | 7.33         | 22.56        | 4.61            | 12.71        | 25.53        | 16.63           |
| D           | 2.79         | 12.38        | 2.57            | 5.72         | 20.99        | 3.15            | 8.77         | 28.41        | 7.23            |
| E           | 4.84         | 7.23         | 26.03           | 7.40         | 10.79        | 18.31           | 61.52        | 53.04        | 52.61           |
| F           | 5.07         | 4.07         | 25.52           | 12.00        | 36.11        | 8.37            | 146.6        | 118.8        | 60.83           |

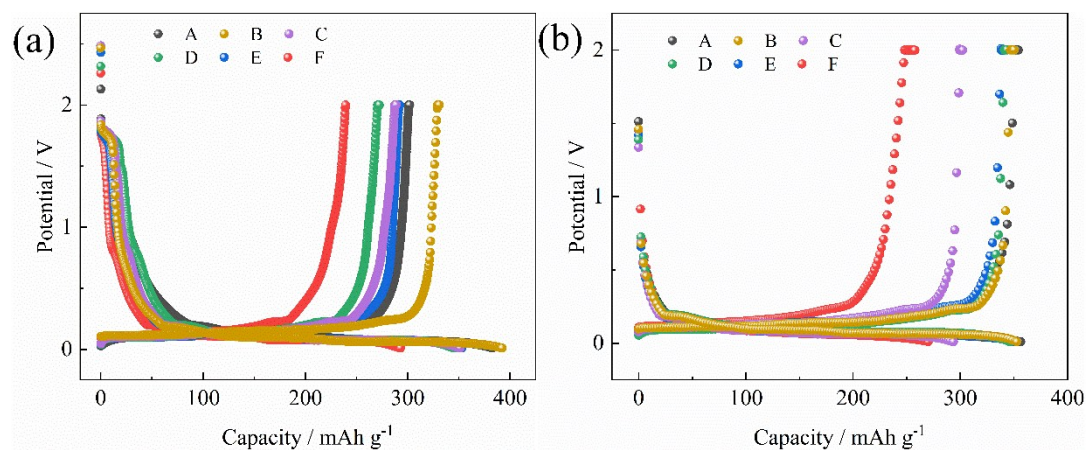

Fig. S4 (a) The first and (b) the 50th charge-discharge curves of Li/graphite cells cycled at 75°C

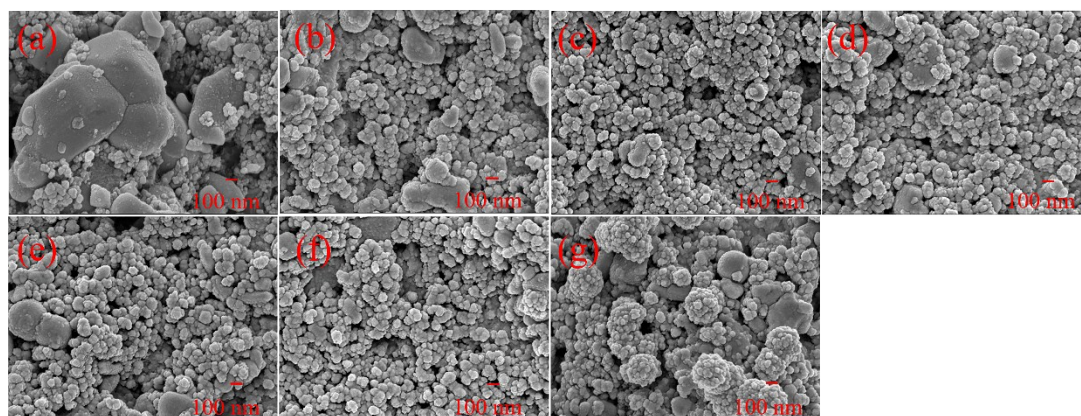

Fig. S5 SEM images of (a) fresh LFP and LFP after 10 cycles at 75 °C with different electrolytes: (b) electrolyte A, (c) electrolyte B, (d) electrolyte C, (e) electrolyte D, (f) electrolyte E, (g) electrolyte F.



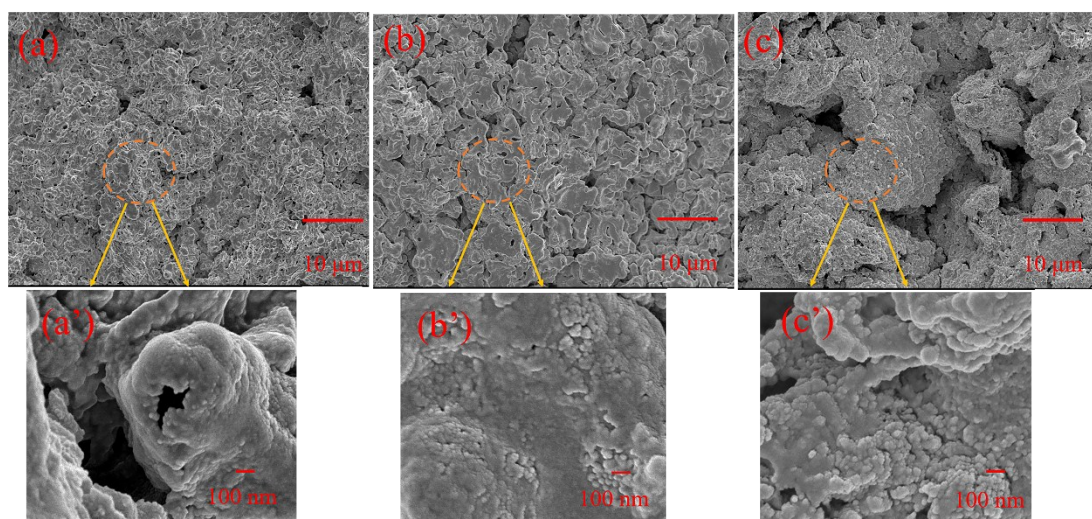

**Fig. S6** SEM images of graphite after 100 cycles in (a) electrolyte A, (b) electrolyte B and (c) electrolyte F.
